# Supplementary material
Source: Royal Society of Chemistry journal article supplement (doi:10.1039/d6qi00242k)
Supplement: d6qi00242k1.pdf [file d6qi00242k1.pdf]

**High-performance cathode for aqueous zinc-ion batteries: a novel lithium vanadate heterojunction with excellent mixed lithium-ion and electron conduction derived from decavanadate-type polyoxometalate**

Ke-Fan Wang,<sup>a</sup> Ding-Jie Ma,<sup>a</sup> Zi-Qian Zeng,<sup>a</sup> Cheng Wang,<sup>a</sup> Yang Zou,<sup>c</sup> Qiao Qiao,<sup>c</sup> Zhi-Yuan Yao,<sup>a,b\*</sup> Xiao-Ming Ren<sup>b,c,d</sup>

<sup>a</sup> School of Physical and Mathematical Science, Nanjing Tech University, Nanjing 211816, P. R. China

<sup>b</sup> State Key Laboratory of Materials-Oriented Chemical Engineering, Nanjing Tech University, Nanjing 211816, P. R. China

<sup>c</sup> School of Chemistry and Molecular Engineering, Nanjing Tech University, Nanjing 211816, P. R. China

<sup>d</sup> State Key Laboratory of Coordination Chemistry, Nanjing University, Nanjing 210023, P. R. China

Email: [zyyao@njtech.edu.cn](mailto:zyyao@njtech.edu.cn) (ZYY)

## Contents

Fig. S1 (a) PXRD patterns of the as-synthesised **POM-Li** sample, (b) TG curve of **POM-Li**.

Fig. S2 Curves of current against time at DC voltage of 0.1 V.

Fig. S3 (a) Curves of current against time at DC voltage of 0.05 V over the temperature range 338–358 K, (b) Curve of current against time at DC voltage of 0.01 V at 363 K.

Fig. S4 Experimental and fitted impedance spectra of **LiVO** at the selected temperatures (Inset: the equivalent circuit).

Fig. S5 The morphology of the separator after 150 charge/discharge cycles.

Fig. S6 (a) Element mapping and (b) EDS spectrum of **LiVO** cathode after the first discharge.

Table S1 Comparison of the electrochemical performance of **LiVO** with that of  $\text{LiV}_3\text{O}_8$  and  $\text{Li}_{0.45}\text{V}_2\text{O}_5 \cdot 0.89\text{H}_2\text{O}$  single-phase cathode materials for AZIBs.

Table S2 Comparison of the value of  $D_{\text{Zn}^{2+}}$  between **LiVO** and other vanadium-based cathode materials.

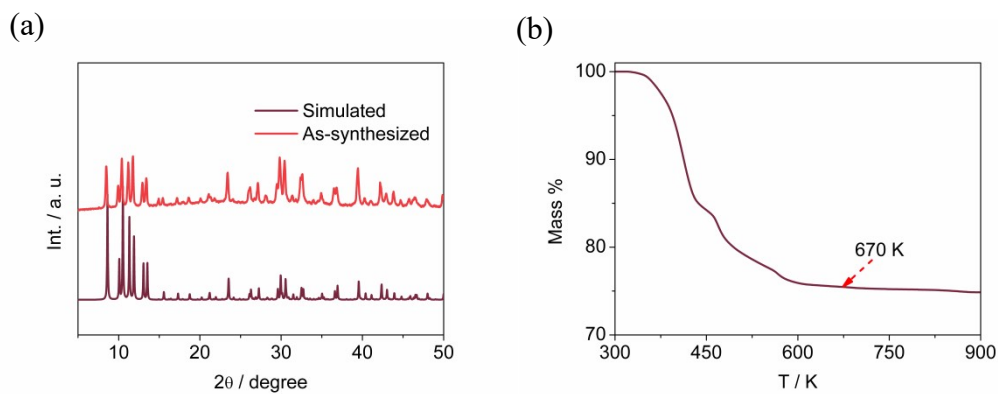

Fig. S1 (a) PXR D patterns of the as-synthesised **POM-Li** sample, (b) TG curve of **POM-Li**.

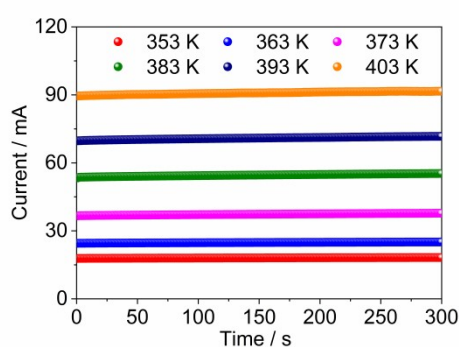

Fig. S2 Curves of current against time at DC voltage of 0.1 V.

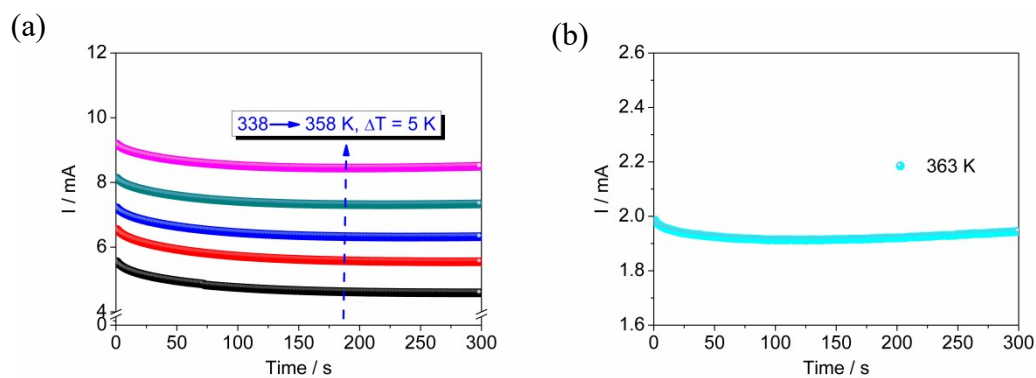

Fig. S3 (a) Curves of current against time at DC voltage of 0.05 V over the temperature range 338–358 K, (b) Curve of current against time at DC voltage of 0.01 V at 363 K.

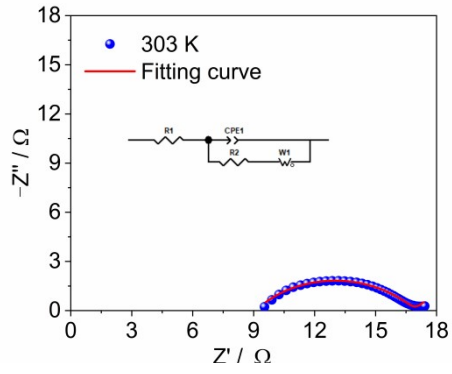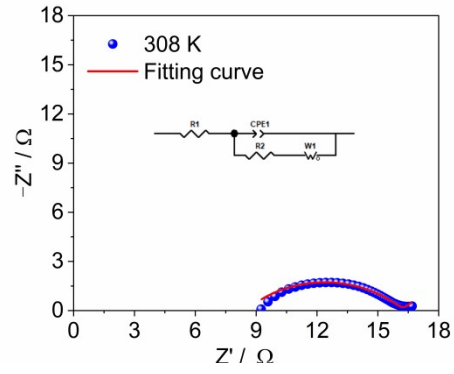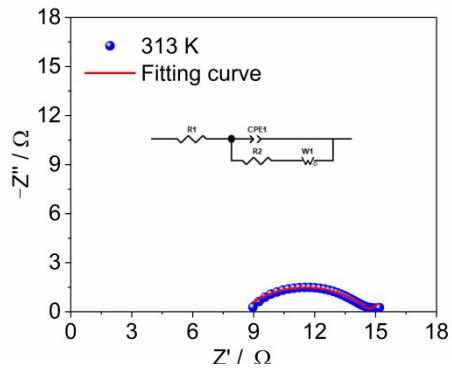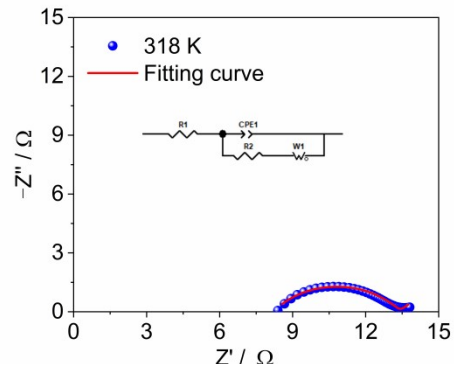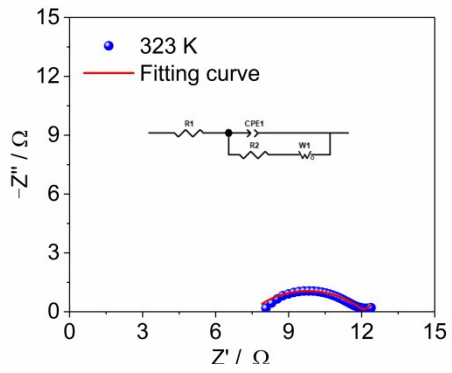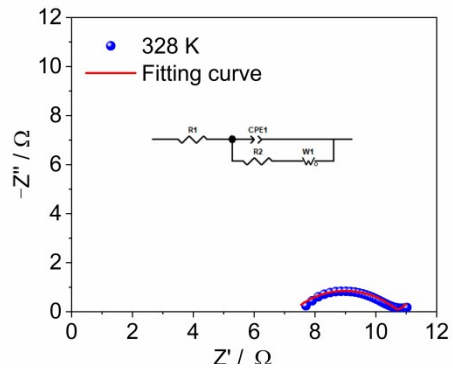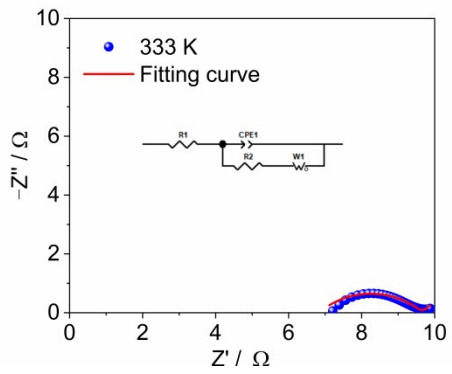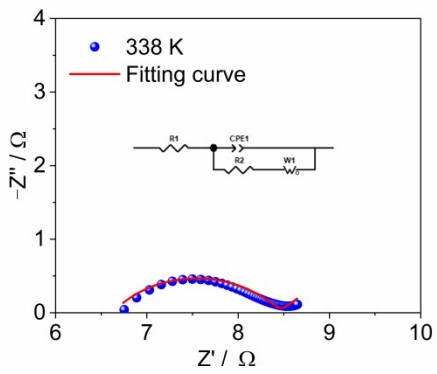

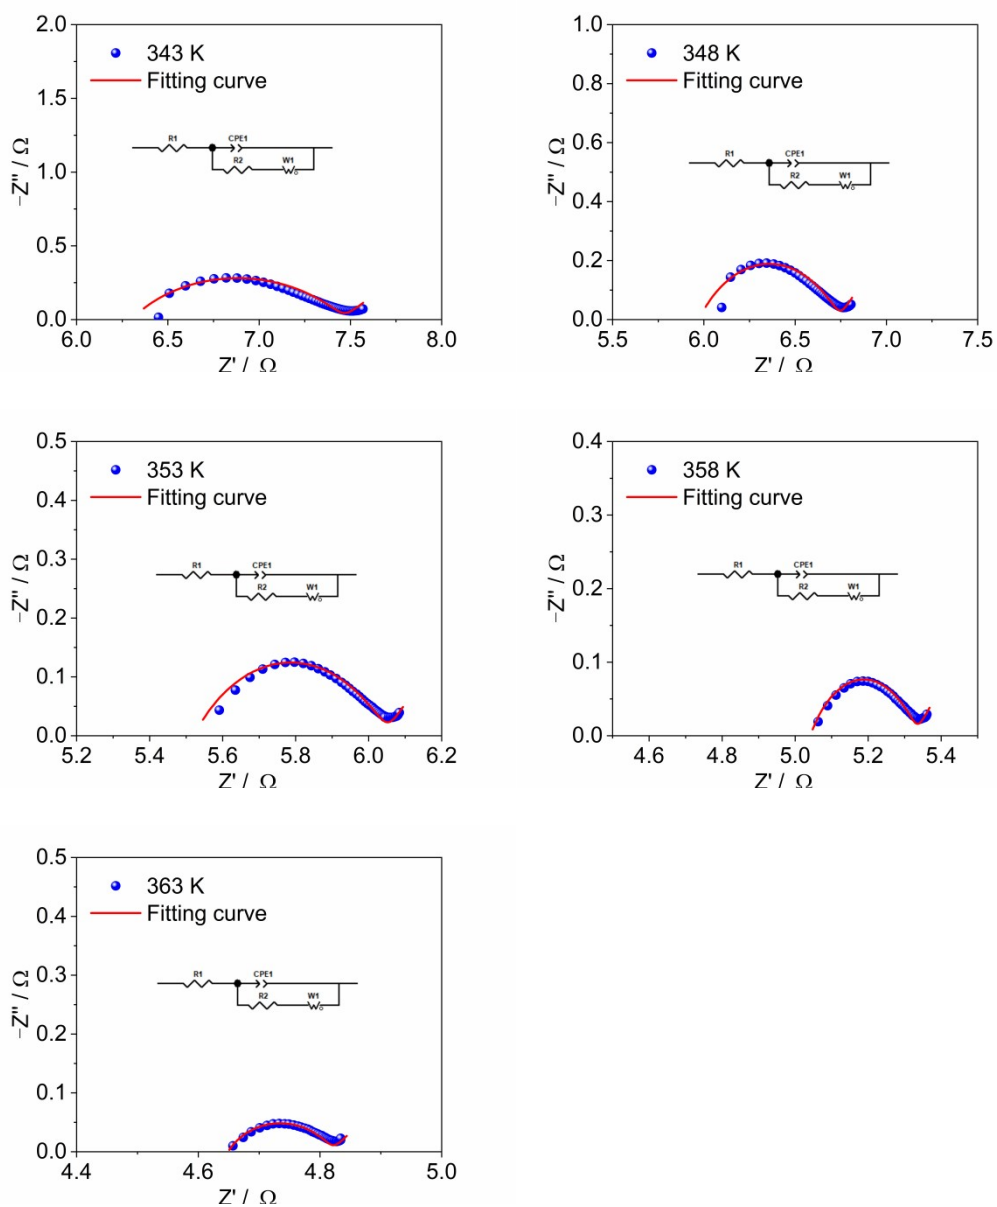

Fig. S4 Experimental and fitted impedance spectra of **LiVO** at the selected temperatures (Inset: the equivalent circuit).

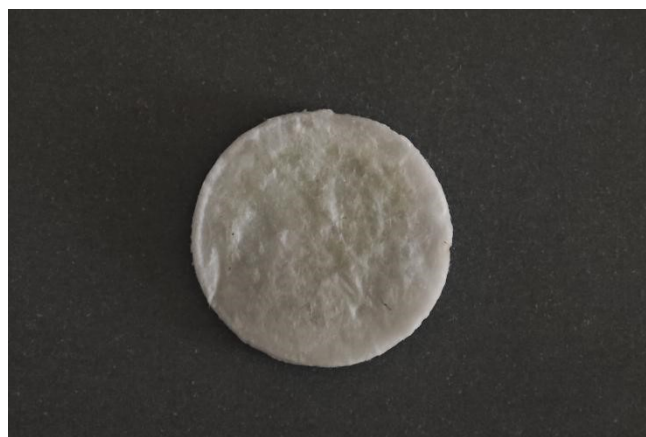

Fig. S5 The morphology of the separator after 150 charge/discharge cycles.

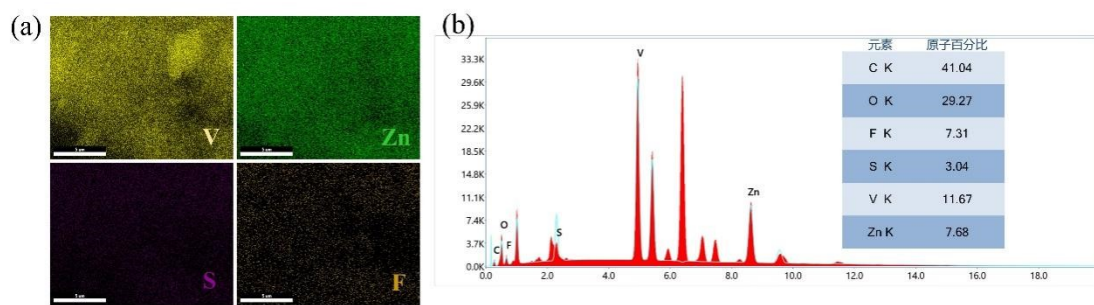

Fig. S6 (a) Element mapping and (b) EDS spectrum of **LiVO** cathode after the first discharge.

Table S1 Comparison of the electrochemical performance of **LiVO** with that of  $\text{LiV}_3\text{O}_8$  and  $\text{Li}_{0.45}\text{V}_2\text{O}_5 \cdot 0.89\text{H}_2\text{O}$  single-phase cathode materials for AZIBs.

| Compounds                                                           | Specific capacity<br>(mAh g <sup>-1</sup> ) |                                  | Capacity retention<br>(loss / cycle)<br>(5 A g <sup>-1</sup> ) | Ref.      |
|---------------------------------------------------------------------|---------------------------------------------|----------------------------------|----------------------------------------------------------------|-----------|
|                                                                     | (0.1 A g <sup>-1</sup> )                    | (2 A g <sup>-1</sup> )           |                                                                |           |
| $\text{LiV}_3\text{O}_8$                                            | 176<br>(0.1 A g <sup>-1</sup> )             | 153<br>(2 A g <sup>-1</sup> )    | 63.3% / 4000<br>(5 A g <sup>-1</sup> )                         | 1         |
| $\text{LiV}_3\text{O}_8$                                            | 350.2<br>(0.1 A g <sup>-1</sup> )           | 250<br>(2 A g <sup>-1</sup> )    | 15% / 4000<br>(5 A g <sup>-1</sup> )                           | 2         |
| $\text{LiV}_3\text{O}_8$                                            | 197<br>(0.1 A g <sup>-1</sup> )             | 74.3<br>(0.8 A g <sup>-1</sup> ) | 23.8% / 7000<br>(0.8 A g <sup>-1</sup> )                       | 3         |
| $\text{Li}_{0.45}\text{V}_2\text{O}_5 \cdot 0.89\text{H}_2\text{O}$ | 345<br>(0.3 A g <sup>-1</sup> )             | 248<br>(2 A g <sup>-1</sup> )    | 14% / 1000<br>(10 A g <sup>-1</sup> )                          | 4         |
| <b>LiVO</b>                                                         | 374.9<br>(0.2 A g <sup>-1</sup> )           | 293.9<br>(3 A g <sup>-1</sup> )  | 7.2% / 2000<br>(3 A g <sup>-1</sup> )                          | This work |

Table S2 Comparison of the value of  $D_{\text{Zn}^{2+}}$  between **LiVO** and other vanadium-based cathode materials.

| Cathode                                                            | The value of $D_{\text{Zn}^{2+}}$                                                | Ref.      |
|--------------------------------------------------------------------|----------------------------------------------------------------------------------|-----------|
| $\text{Zn}_x\text{V}_2\text{O}_5 \cdot n\text{H}_2\text{O}$        | $10^{-12}$ – $10^{-11}$ cm <sup>2</sup> s <sup>-1</sup>                          | 5         |
| $\text{O}_d\text{-VO}$                                             | $0.4 \times 10^{-11}$ – $1.1 \times 10^{-11}$ cm <sup>2</sup> s <sup>-1</sup>    | 6         |
| VO-300                                                             | $2.278 \times 10^{-16}$ – $2.77 \times 10^{-11}$ cm <sup>2</sup> s <sup>-1</sup> | 7         |
| $\text{Zn}_x\text{LiV}_3\text{O}_8$                                | $10^{-14}$ – $10^{-10}$ cm <sup>2</sup> s <sup>-1</sup>                          | 8         |
| $\text{Ba}_{1.2}\text{V}_6\text{O}_{16} \cdot 3\text{H}_2\text{O}$ | $10^{-12}$ – $10^{-9}$ cm <sup>2</sup> s <sup>-1</sup>                           | 9         |
| <b>LiVO</b>                                                        | $1.3 \times 10^{-11}$ – $6.0 \times 10^{-9}$ cm <sup>2</sup> s <sup>-1</sup>     | This work |

## References

## References

- [1] Q. Pang, X. Yu, S. Zhang, W. He, S. Yang, Y. Fu, Y. Tian, M. Xing and X. Luo, High-Capacity and Long-Lifespan Aqueous  $\text{LiV}_3\text{O}_8/\text{Zn}$  Battery Using Zn/Li Hybrid Electrolyte, *Nanomaterials*, 2021, **11**, 1429.

- [2] P. He, M. Yan, X. Liao, Y. Luo, L. Mai and C.-W. Nan, Reversible  $V^{3+}/V^{5+}$  Double Redox in Lithium Vanadium Oxide Cathode for Zinc Storage, *Energy Storage Mater.*, 2020, **29**, 113.
- [3] J. Pyun, H. Lee, H. Lee, H. Kwon, H. Lee, S.-T. Hong, W.-J. Lee, M. S. Chae, Unveiling the Charge Storage Mechanism of High-Performance  $LiV_3O_8$  Cathode for  $Mn^{2+}/H^+$  Hybrid Batteries, *Small*, 2025, **21**, 2504200.
- [4] Y. Tong, X. Li, S. Su, J. Li, J. Fang, B. Liang, J. Hou, M. Luo, Hydrated Lithium Ions Intercalated  $V_2O_5$  with Dual-Ion Synergistic Insertion Mechanism for High-Performance Aqueous Zinc-Ion Batteries, *J. Colloid Interface Sci.*, 2022, **606**, 645.
- [5] M. Liao, J. Wang, L. Ye, H. Sun, Y. Wen, C. Wang, X. Sun, B. Wang and H. Peng, A Deep-Cycle Aqueous Zinc-ion Battery Containing an Oxygen-Deficient Vanadium Oxide Cathode, *Angew. Chem. Int. Ed.*, 2020, **59**, 2273–2278.
- [6] K. Hu, D. Jin, Y. Zhang, L. Ke, H. Shang, Y. Yan, H. Lin, K. Rui and J. Zhu, Metallic Vanadium Trioxide Intercalated with Phase Transformation for Advanced Aqueous Zinc-Ion Batteries, *J. Energy Chem.*, 2021, **61**, 594–601.
- [7] F. Liang, M. Chen, S. Zhang, Z. Zou, C. Ge, S. Jia, S. Le, F. Yu and J. Nong, Electrochemical Activation in Vanadium Oxide with Rich Oxygen Vacancies for High-Performance Aqueous Zinc-Ion Batteries, *ACS Sustainable Chem. Eng.*, 2024, **12**, 5117–5128.
- [8] P. He, M. Yan, X. Liao, Y. Luo, L. Mai and C.-W. Nan, Reversible  $V^{3+}/V^{5+}$  Double Redox in Lithium Vanadium Oxide Cathode for Zinc Storage, *Energy Storage Mater.*, 2020, **29**, 113–120.
- [9] X. Wang, B. Xi, X. Ma, Z. Feng, Y. Jia, J. Feng, Y. Qian and S. Xiong, Boosting Zinc-Ion Storage Capability by Effectively Suppressing Vanadium Dissolution Based on Robust Layered Barium Vanadate, *Nano Lett.*, 2020, **20**, 2899–2906.
